# Supplementary material for: Permeability of Ciprofloxacin-Loaded Polymeric Micelles Including Ginsenoside as P-glycoprotein Inhibitor through a Caco-2 Cells Monolayer as an Intestinal Absorption Model
Source: PubMed Central journal article supplement (PMC6222528; doi:10.3390/molecules23081904), 2018-07-31
Supplement: molecules-23-01904-s001.pdf [file molecules-23-01904-s001.pdf]

**Supplementary Materials:****Permeability of Ciprofloxacin-Loaded Polymeric Micelles Including Ginsenoside as P-glycoprotein Inhibitor through a Caco-2 Cells Monolayer as an Intestinal Absorption Model**

Behzad Sharif Makhmal Zadeh \*, Golbarg Esfahani and Anayatollah Salimi

Nanotechnology Research Center, School of Pharmacy, Ahvaz Jundishapur University of Medical Sciences, Golestan Ave, Ahvaz 67123, Iran; anayatsalimi2003@yahoo.com; golbarg\_isfahani@yahoo.com

\* Correspondence: makhmalzadeh@yahoo.com; Tel.: +98-9163159706

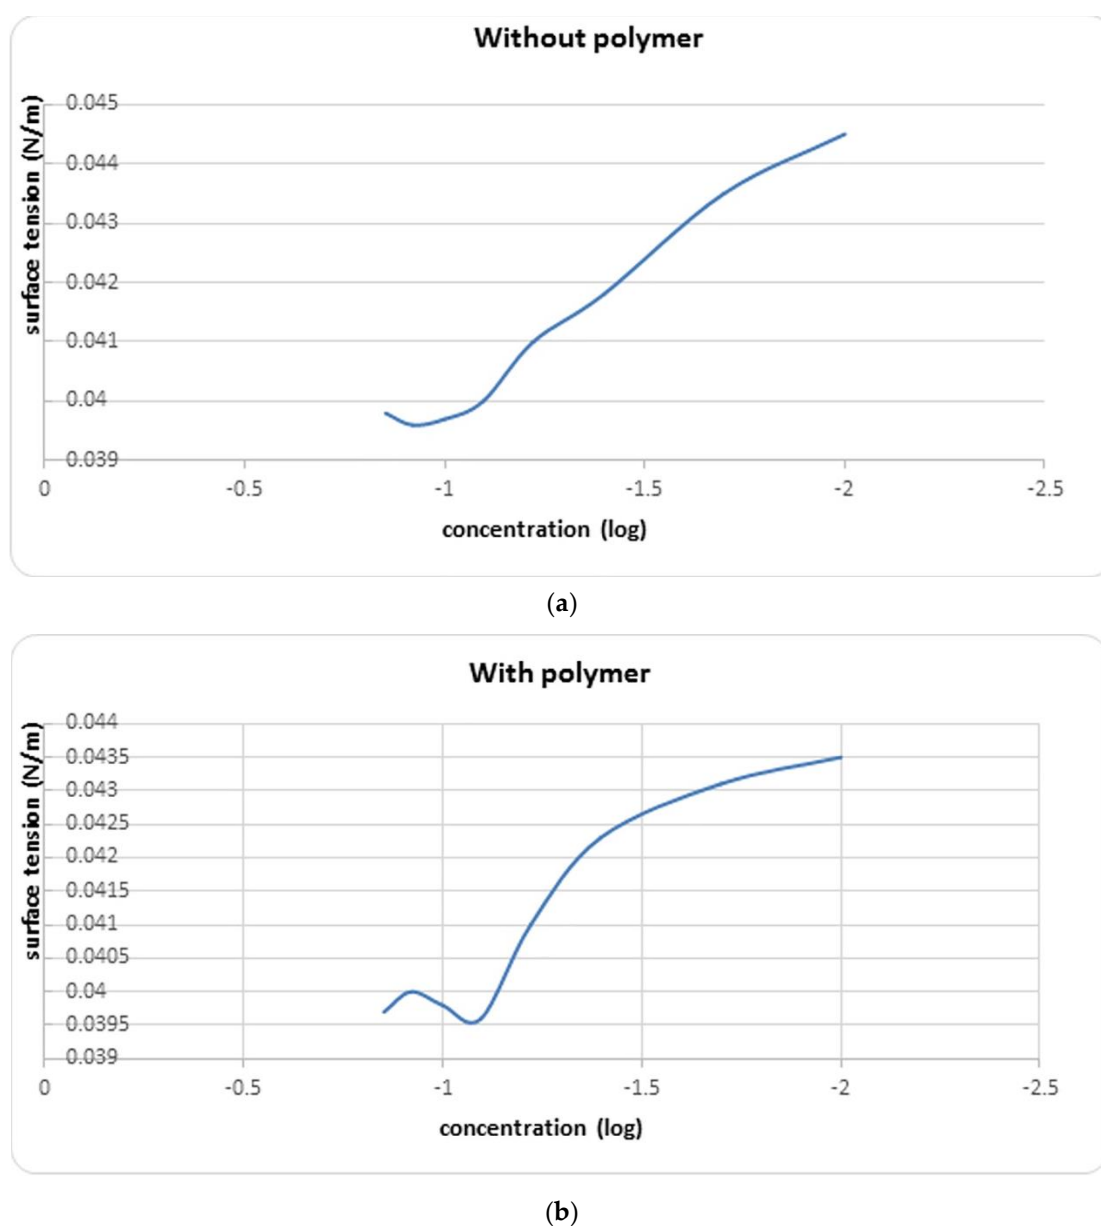**Figure S1.** Surface tension versus logarithm of lab+las concentration: (a) without polymer; (b) with polymer.
